# Supplementary material for: A Nanoclay-Enhanced Hydrogel for Self-Adhesive Wearable Electrophysiology Electrodes with High Sensitivity and Stability
Source: MDPI journal article supplement (doi:10.3390/gels9040323), 2023-04-11
Supplement: s1 [file s1]

# A Nanoclay-Enhanced Hydrogel for Self-Adhesive Wearable Electrophysiology Electrodes with High Sensitivity and Stability

Fushuai Wang <sup>1,†</sup>, Lang Yang <sup>2,†</sup>, Ye Sun <sup>2</sup>, Yiming Cai <sup>1</sup>, Xin Xu <sup>3</sup>, Zhenzhong Liu <sup>3,\*</sup>, Qijie Liu <sup>3</sup>, Hongliang Zhao <sup>2,4</sup>, Chunxin Ma <sup>2,3,4,\*</sup> and Jun Liu <sup>1,3,\*</sup>

<sup>1</sup> Key Laboratory for Biomedical Engineering of Education Ministry, Department of Biomedical Engineering, Zhejiang University, Hangzhou 310027, China; 22160241@zju.edu.cn (F.W.); 22215040@zju.edu.cn (Y.C.)

<sup>2</sup> State Key Laboratory of Marine Resource Utilization in South China Sea, Hainan University, Haikou 570228, China; 21220856000067@hainanu.edu.cn (L.Y.); sunye@hainanu.edu.cn (Y.S.)

<sup>3</sup> Taizhou Key Laboratory of Medical Devices and Advanced Materials, Research Institute of Zhejiang University-Taizhou, Taizhou 318000, China; xuxinmark@163.com (X.X.); tanksman@163.com (Q.L.)

<sup>4</sup> Key Laboratory of Quality Safe Evaluation and Research of Degradable Material for State Market Regulation, Products Quality Supervision and Testing Institute of Hainan Province, Haikou 570203, China; hnxxzhao@126.com (H.Z.)

\* Correspondence: zzliu@zju.edu.cn (Z.L.); machunxin@hainanu.edu.cn (C.M.); liujun@zju.edu.cn (J.L.); Tel.: +86-0576-88190681 (Z.L.); +86-0898-66292367 (C.M.); +86-0576-88190571 (J.L.)

† These authors contributed equally to this work.

This PDF file includes:

Supplementary Materials and Methods

Figure S1 to **S7**

**Supporting Figures**

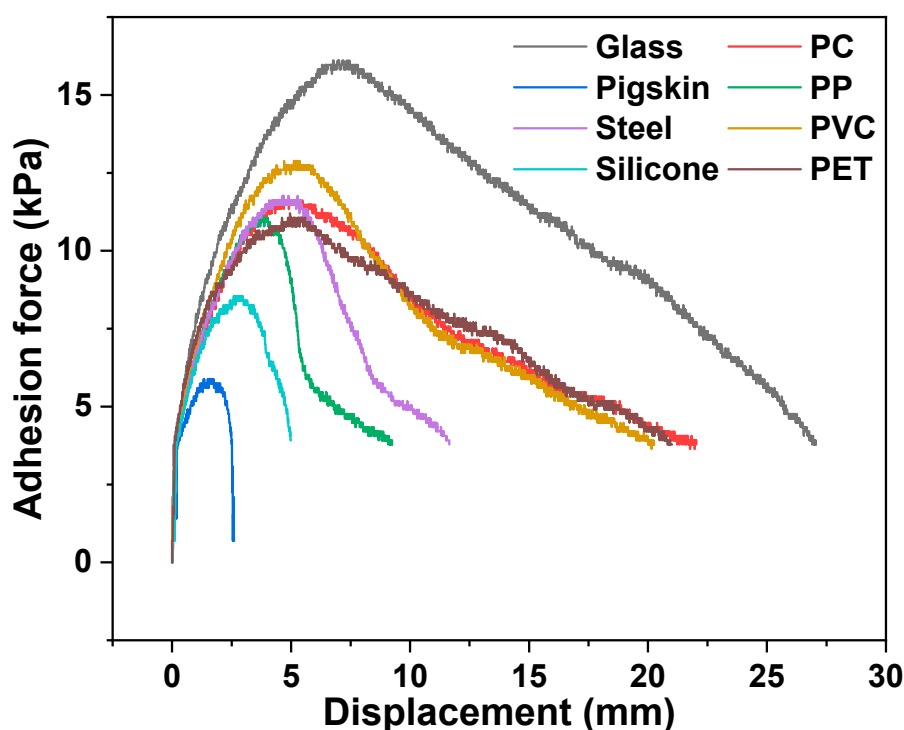

Figure S1. Adhesion shear-displacement curves at different substrates for (NEH-0.5%).

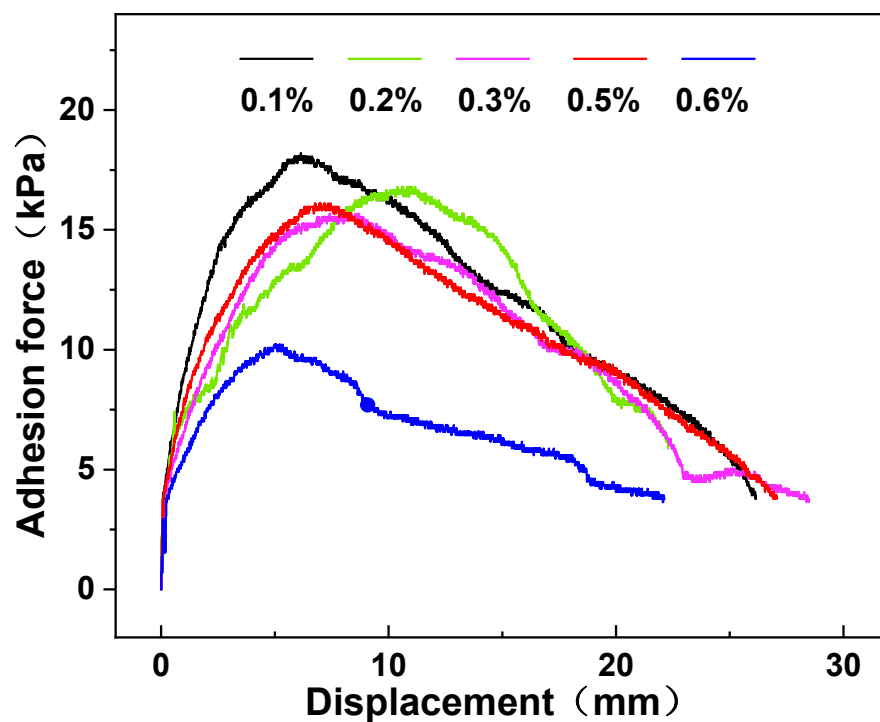

**Figure S2.** Adhesion shear-displacement curves at glass substrate for NEH with different percentage content of nanoclay.

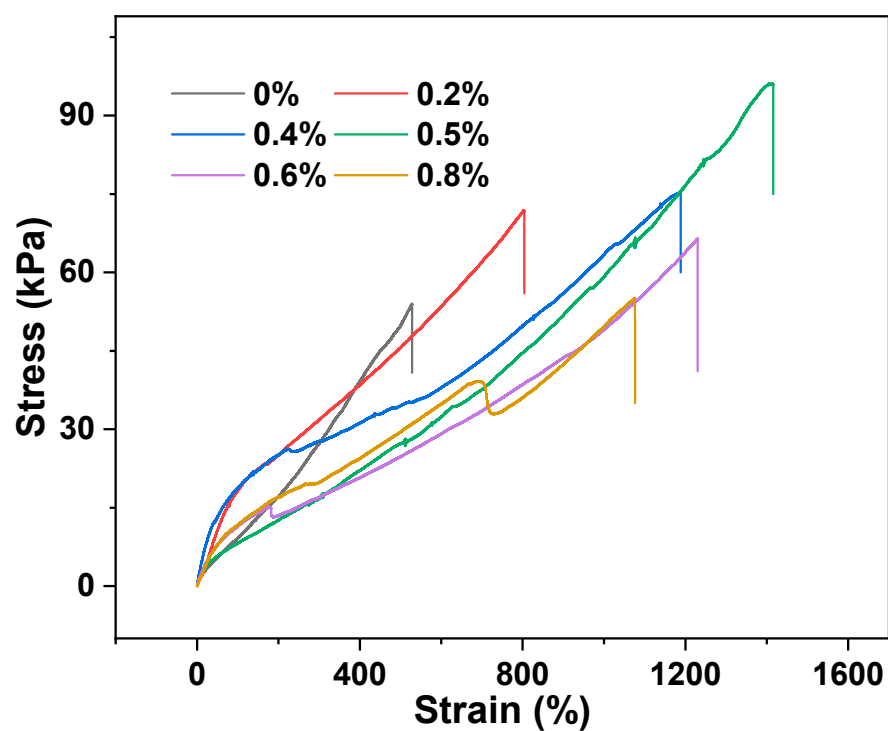

**Figure S3.** Stress-strain curves for NEH with different percentage content of nanoclay.

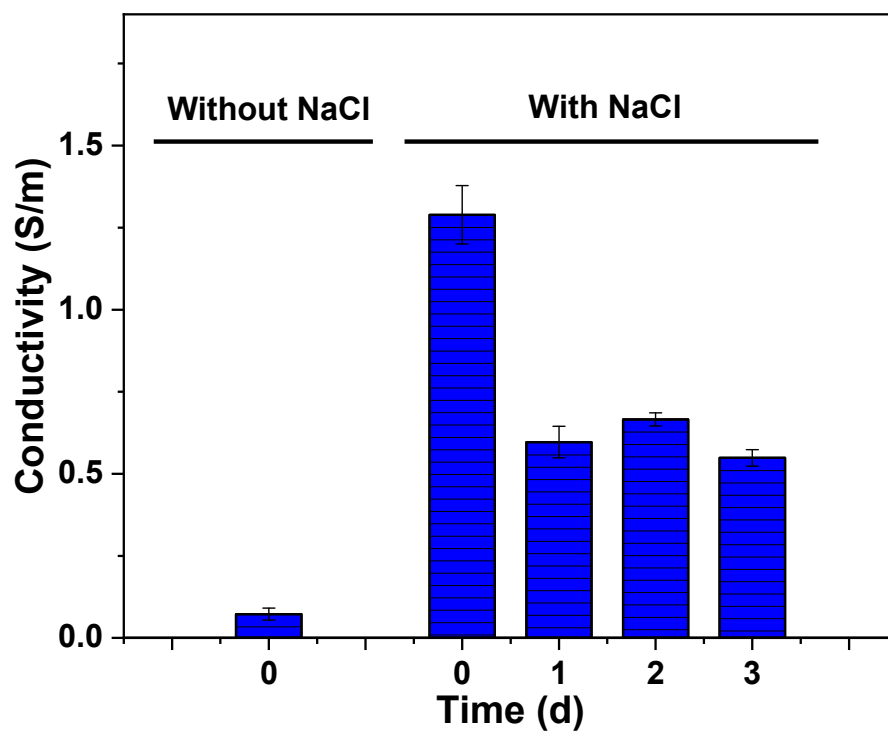

**Figure S4.** The conductivity test for NEH without NaCl and NEH with NaCl within 3 days.

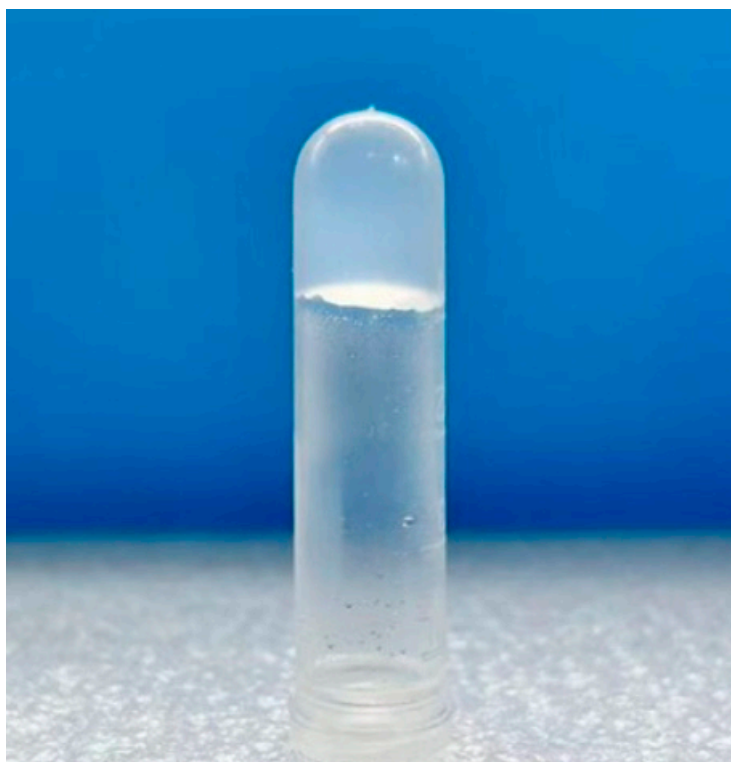

**Figure S5.** The gelation of hydrogel was activated by the nanoclay without BIS.

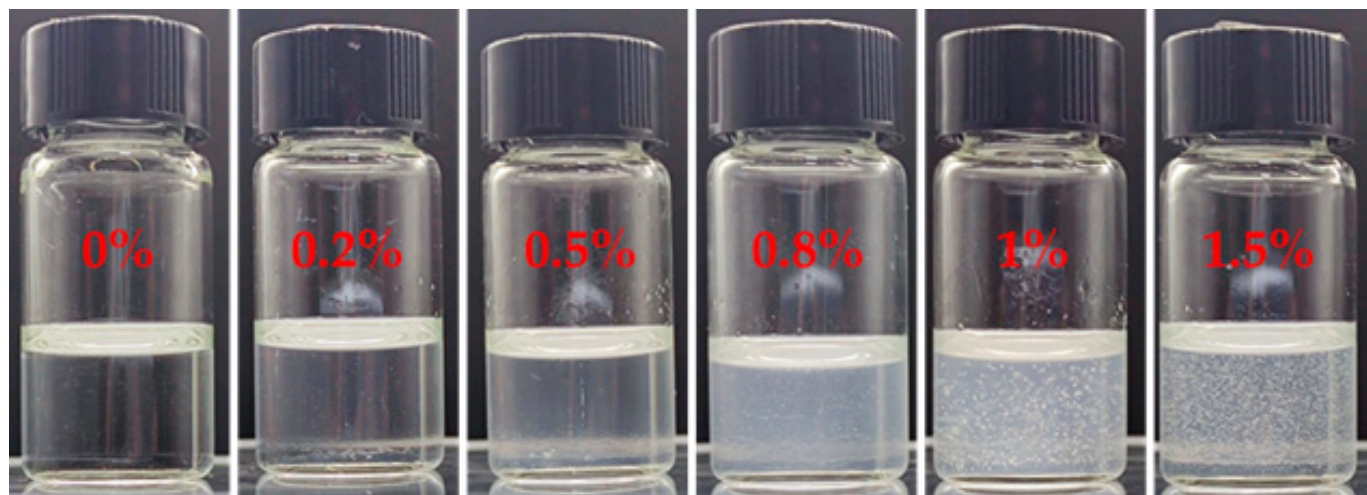

**Figure S6.** Optical photos of precursor solution with nanoclay content at 0%, 0.2%, 0.5%, 0.8%, 1.0%, and 1.5%, respectively.

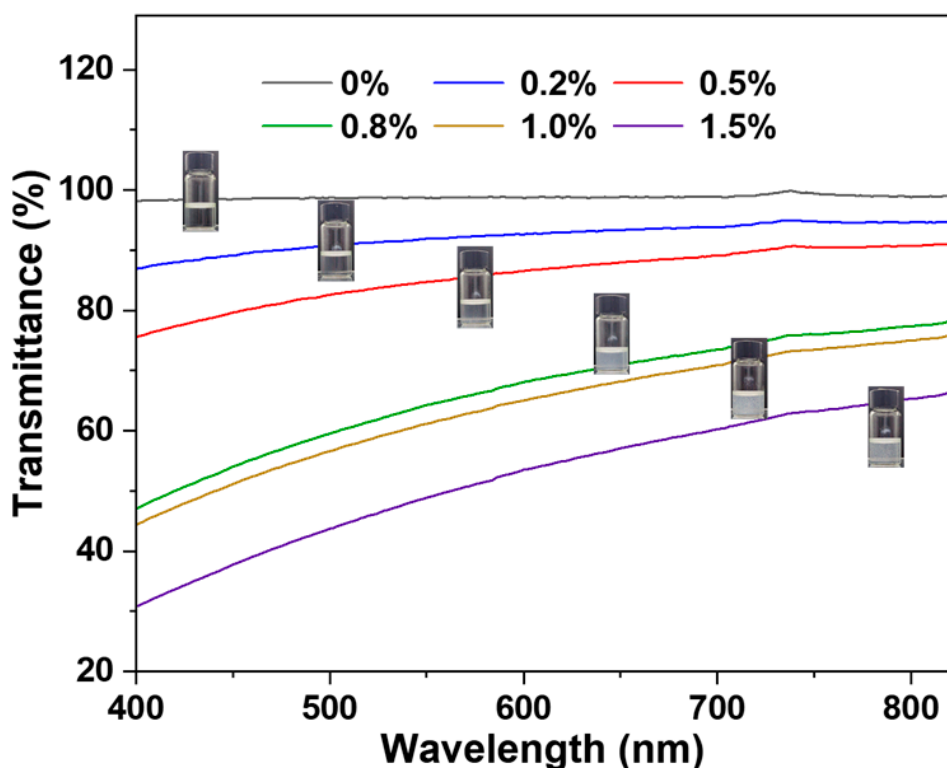

**Figure S7.** Light transmittance results of precursor solution with different nanoclay content at 0%, 0.2%, 0.5%, 0.8%, 1.0%, and 1.5%, respectively.
